# Supplementary material for: Ultralong PtNi alloy nanowires enabled by the coordination effect with superior ORR durability
Source: Royal Society of Chemistry journal article supplement (doi:10.1039/c6ra14192g), 2016-01-01
Supplement: c6ra14192g1.pdf [file c6ra14192g1.pdf]

## Ultralong PtNi Alloy Nanowires Enabled by the Coordination Effect with Superior ORR Durability

Ting-Wen Chen, Jian-Xin Kang, Dong-Feng Zhang\* and Lin Guo\*

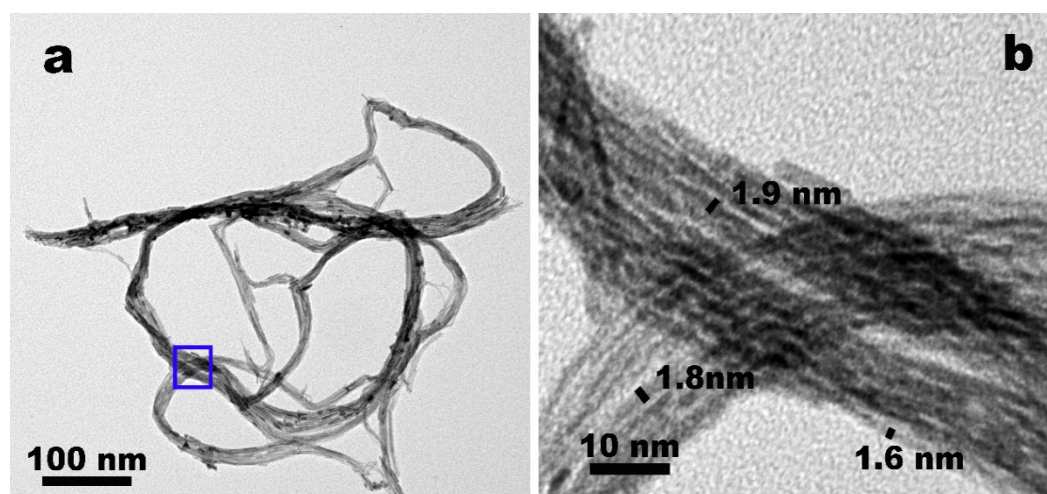

Figure S1. (a) Low-, and (b) high-magnified TEM image of pure Pt nanowires obtained under similar condition but without the introduction of  $\text{NiCl}_2$ .

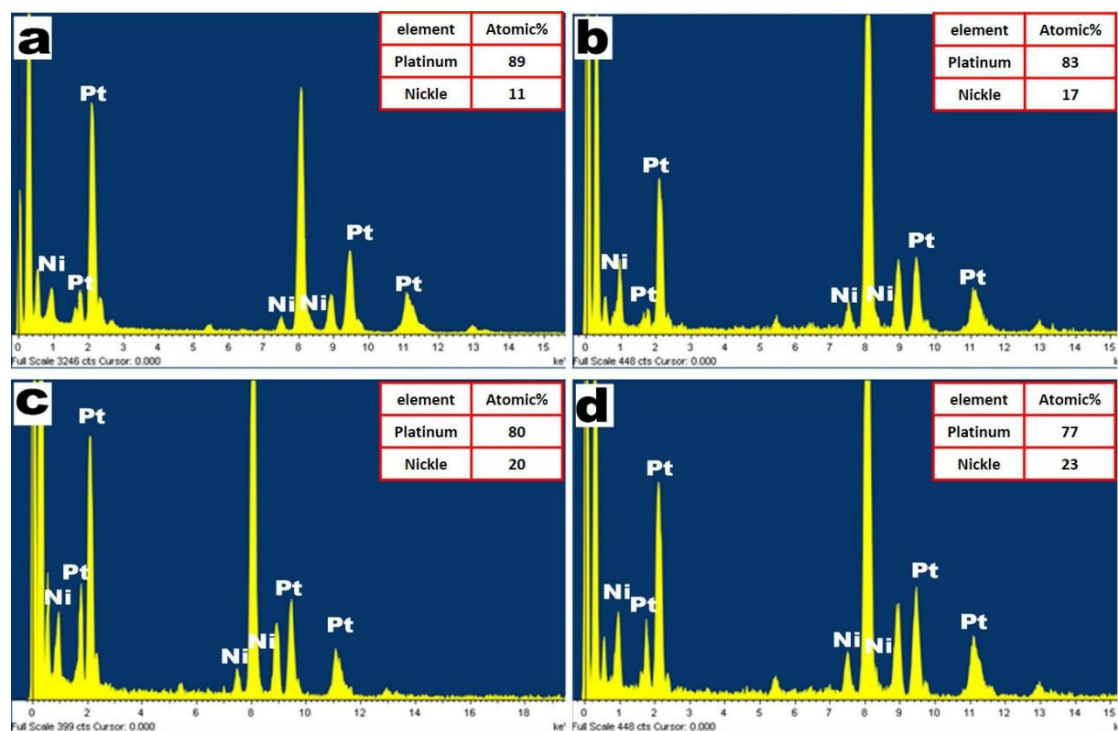

Figure S2. The EDS data of the products collected at different reaction stage: (a) 40 min, (b) 50 min, (c) 80 min, (d) 120 min.

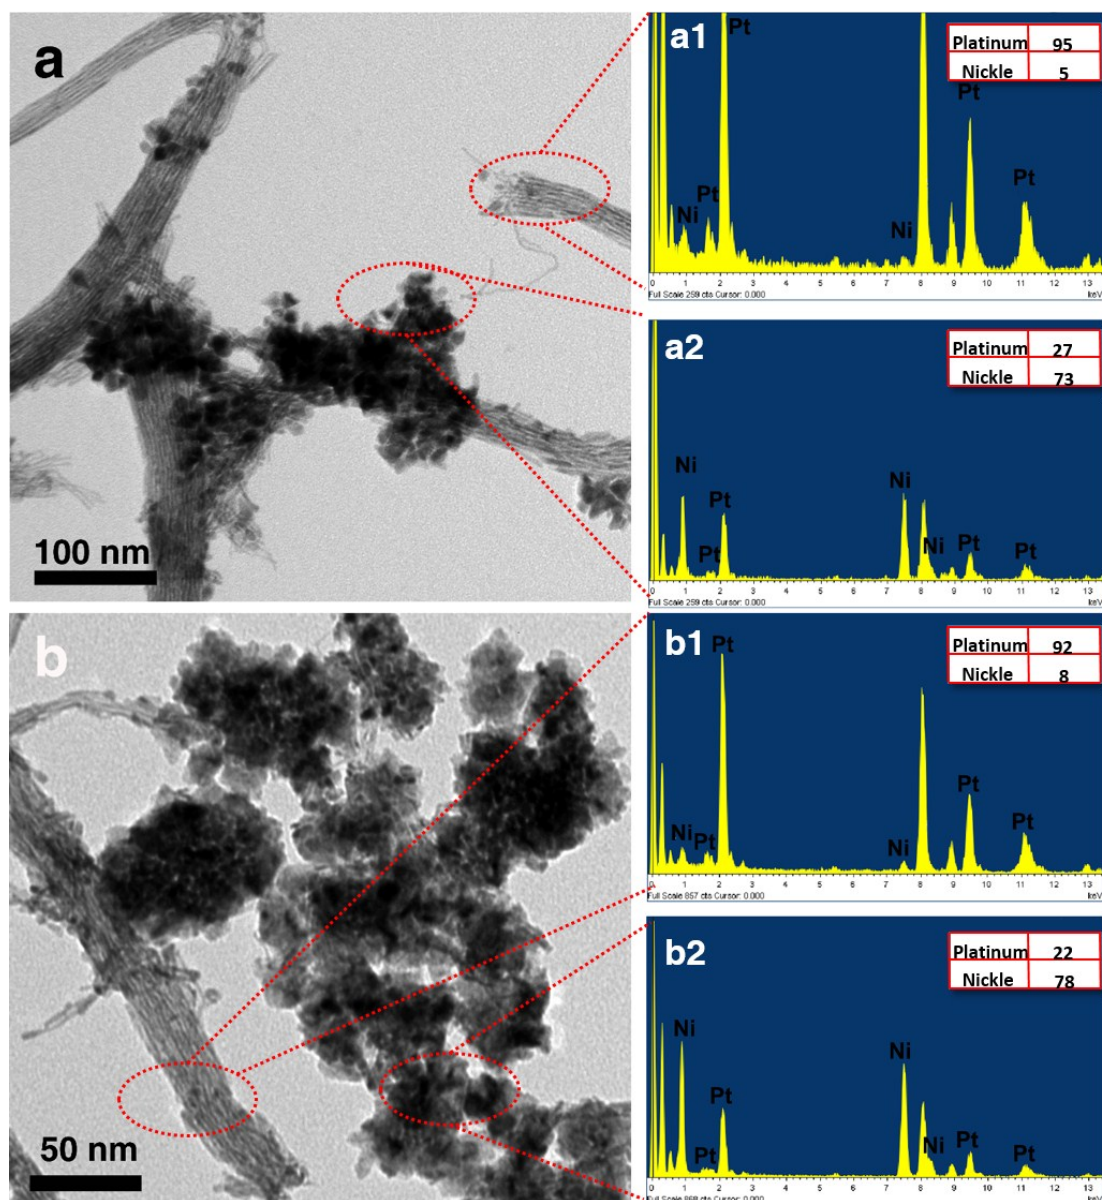

Figure S3. The TEM images and the corresponding EDS data recorded at different areas of the as-obtained products by using (a)  $\text{NiSO}_4$  and (b)  $\text{Ni(NO}_3)_2$  as the source of Ni(II), respectively.

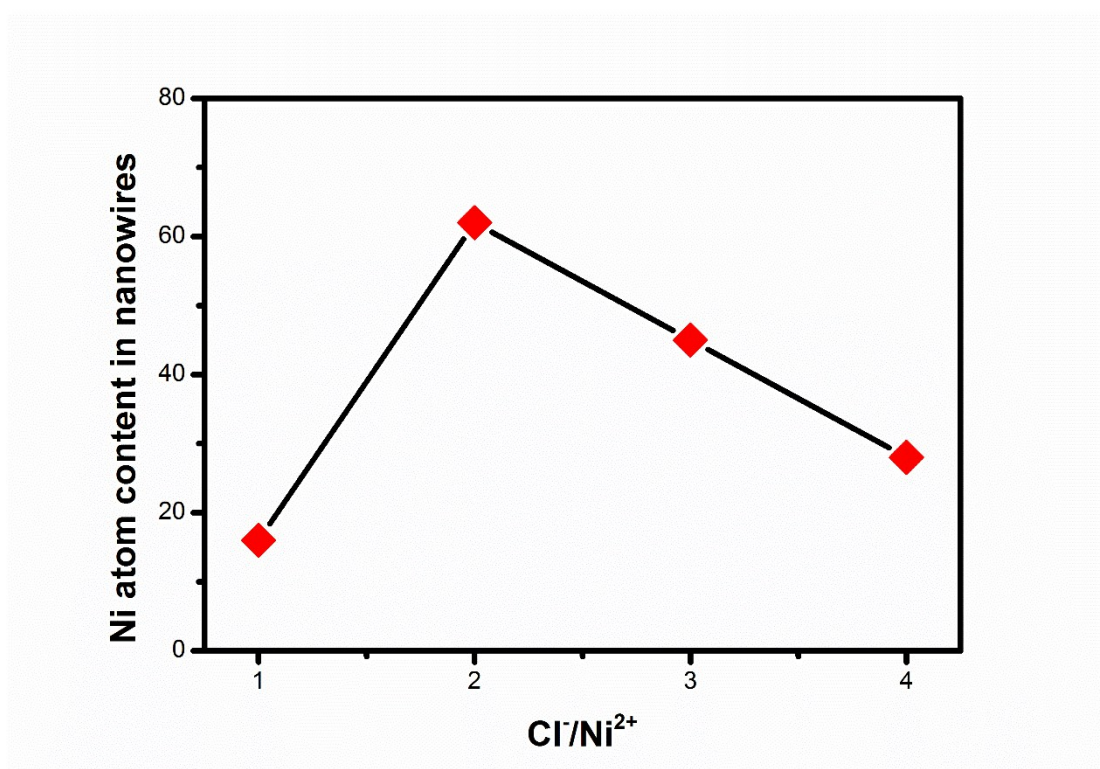

Figure S4. Ni-content in the nanowire depends on different Cl<sup>-</sup>/Ni<sup>2+</sup> molar ratio.

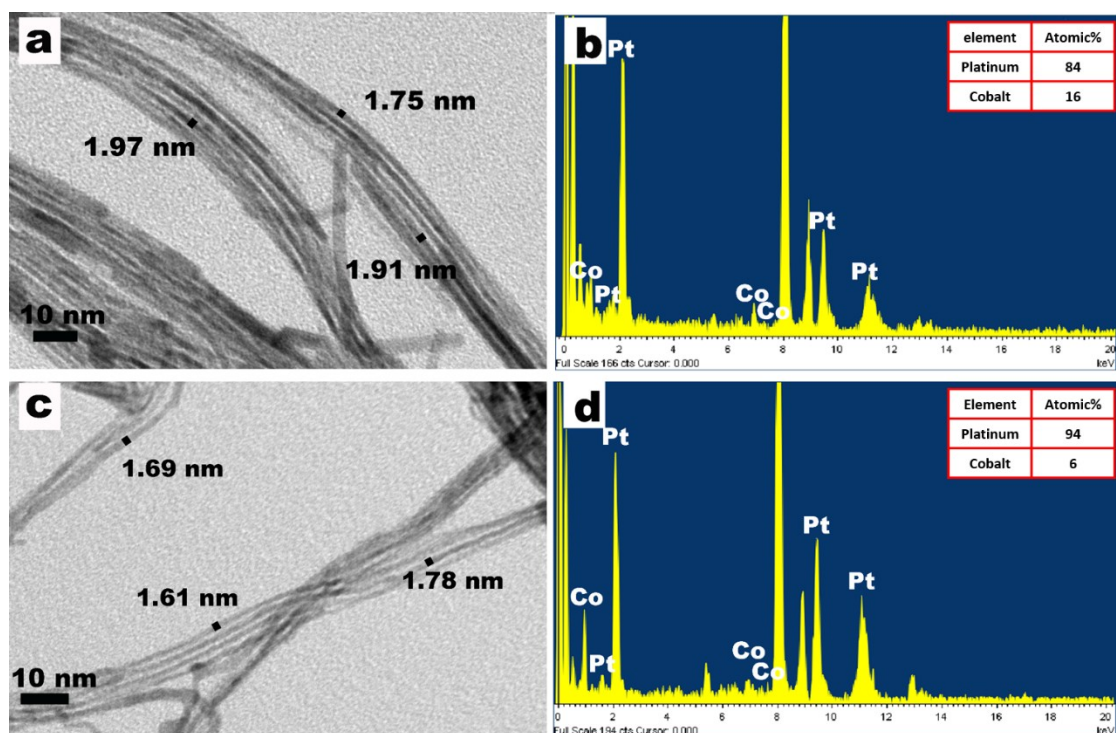

Figure S5. (a, c)TEM images and (b, d) the corresponding EDS data of the as-obtained PtCo nanowires by using  $\text{CoCl}_2$  and  $\text{Co}(\text{NO}_3)_2$  as the source of Co(II), respectively.

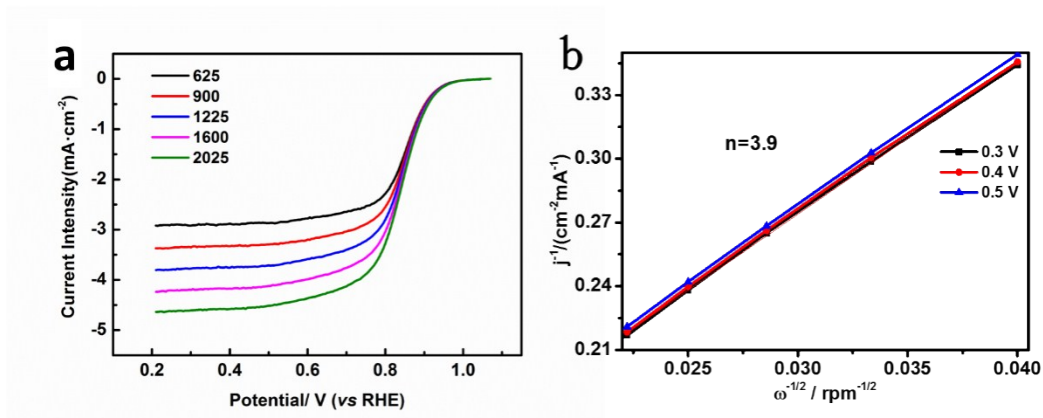

Figure S6. Linear sweep voltammetry curves under different rotation rate (a), and Koutecky-Levich plot at different volts for Pt<sub>75</sub>Ni<sub>25</sub> catalysts in 0.1 M KOH aqueous solution with sweeping rate of 0.05 V·s<sup>-1</sup>.

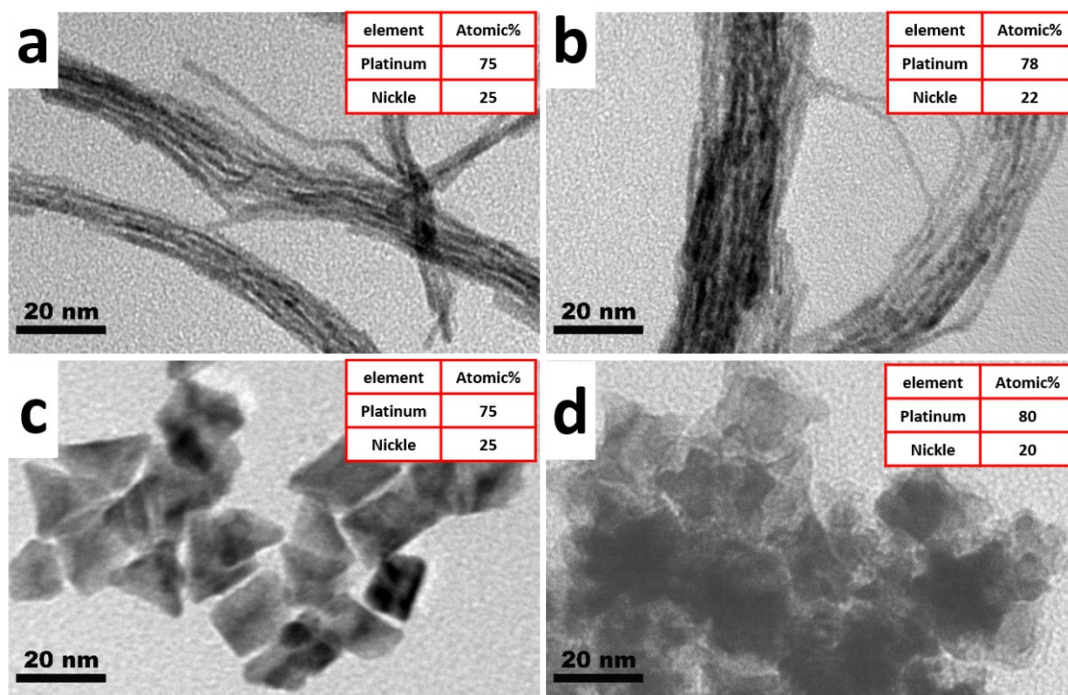

Figure S7. The TEM images of PtNi nanowires and PtNi nanoparticles before (a, c) and after (b, d) durability tests towards ORR, respectively.
